# Supplementary material for: New thiocyanatocadmates with bidentate N-heterocyclic molecules as the templating agents: synthesis and structural characterization
Source: Royal Society of Chemistry journal article supplement (doi:10.1039/c2ce26164b), 2012-01-01
Supplement: c2ce26164b.pdf [file c2ce26164b.pdf]

## Supporting Materials

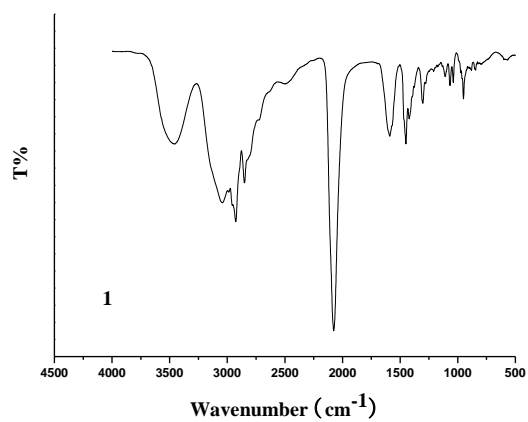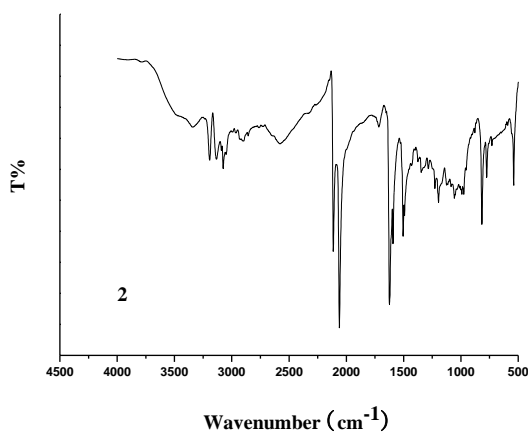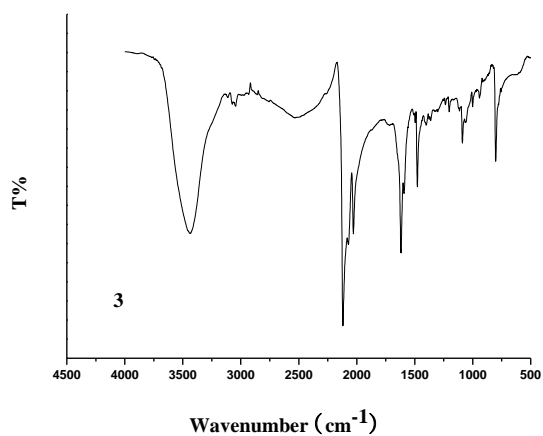

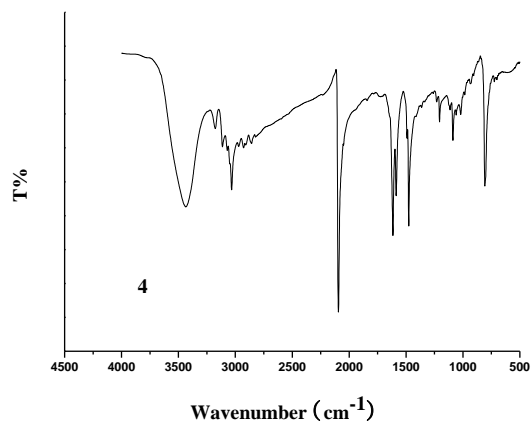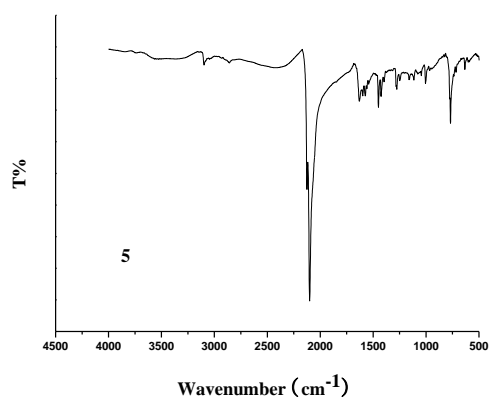

Fig. S1 The IR spectra for compounds 1-5.

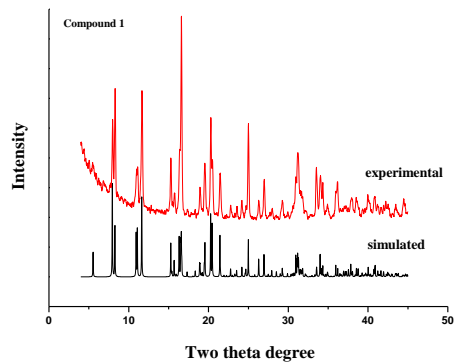

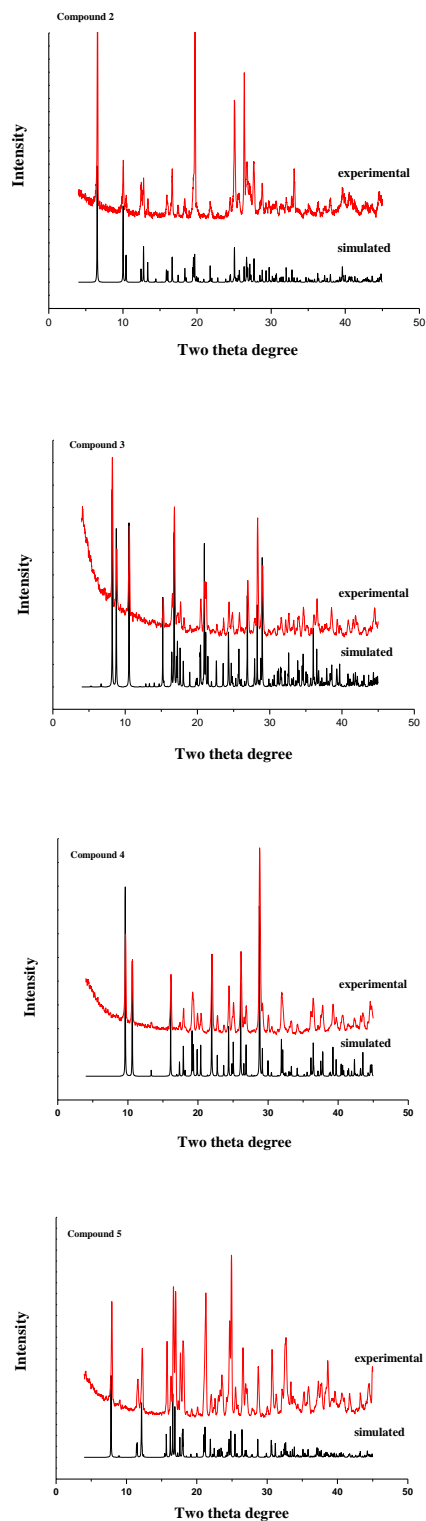

Fig. S2 The simulated (black) and experimental (red) powder XRD patterns for compounds 1-5.

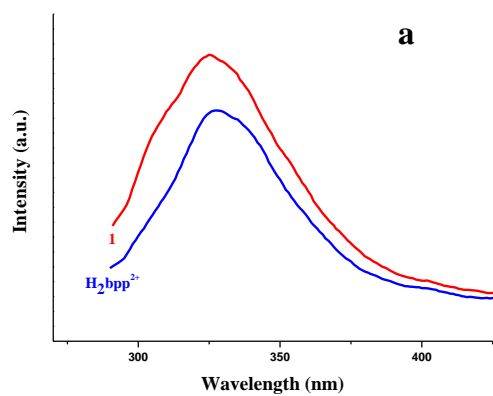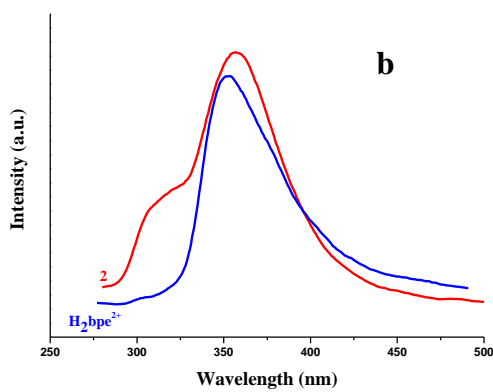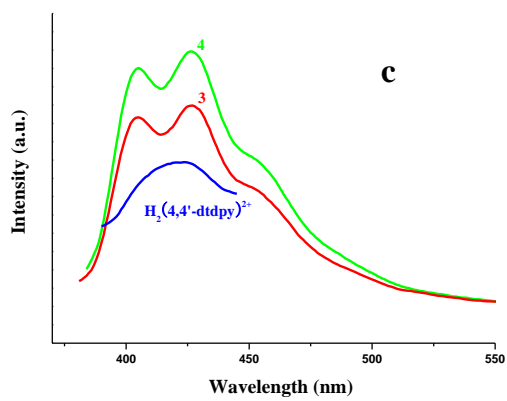

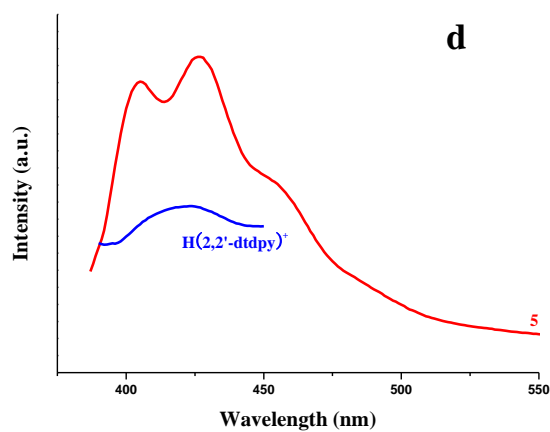

Fig. S3 The emission spectra of compound 1 and H<sub>2</sub>bpp<sup>2+</sup> (a), compound 2 and H<sub>2</sub>bpe<sup>2+</sup> (b), compounds 3, 4 and H<sub>2</sub>(4,4'-dtdpy)<sup>2+</sup> (c) as well as compound 5 and H(2,2'-dtdpy)<sup>+</sup> (d).

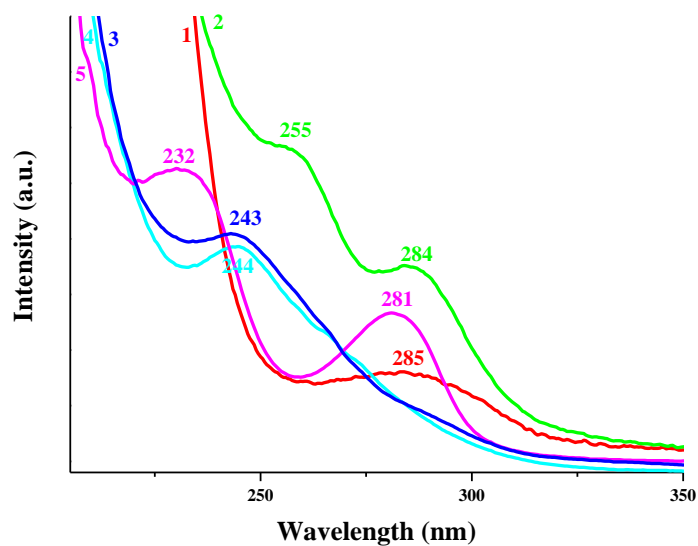

Fig. S4 The UV-vis spectra of compounds 1-5 in ethanol solutions.
